# Supplementary material for: Enhanced activity of trinuclear Zn(ii) complexes towards phosphate ester bond cleavage by introducing three-metal cooperativity
Source: Royal Society of Chemistry journal article supplement (doi:10.1039/c7nj03759g), 2017-12-27
Supplement: c7nj03759g1.pdf [file c7nj03759g1.pdf]

### Supplementary information

#### **Enhanced Activity of Trinuclear Zn(II) Complex towards Phosphate Ester Bond Cleavage by Introducing Three Metal Cooperativity**

*Pooja Joshi,<sup>c</sup> Navid Hussain,<sup>a</sup> Shah Raj Ali,<sup>c</sup> Rishu<sup>\*,b</sup> and Vimal K. Bhardwaj<sup>\*,a</sup>*

<sup>a</sup>Department of Chemistry, Indian Institute of Technology Ropar, Rupnagar, Punjab 140001, India.

<sup>b</sup>MCM DAV College for Women, Sector 36A, Chandigarh-160036, India

<sup>c</sup>Department of Chemistry, D.S.B. Campus, Kumaun University, Nainital, Uttarakhand 263002, India

## Table of Contents

| S.<br>No. | Figure No.          | Content                                                                                                                       | Page<br>No.  |
|-----------|---------------------|-------------------------------------------------------------------------------------------------------------------------------|--------------|
| 1         | <b>Figure S1-S3</b> | I.R. spectrum of complex <b>1-3</b>                                                                                           | <b>3-4</b>   |
| 2         | <b>Figure S4-6</b>  | <sup>1</sup> H NMR spectrum of compound <b>1-3</b>                                                                            | <b>4-5</b>   |
| 3         | <b>Figure S7-9</b>  | Packing diagram of compound <b>1-3</b>                                                                                        | <b>6-7</b>   |
| 4         | <b>Figure S10.</b>  | Plots of [DNA]/Δε versus [DNA] obtained by the absorption titration of CT-DNA with <b>1-3</b>                                 | <b>7-8</b>   |
| 5         | <b>Figure S11</b>   | Plot of [DNA]/Δε versus [DNA] obtained by the absorption titration of CT-DNA with <b>2</b> in the absence (presence NaCl)     | <b>9</b>     |
| 6         | <b>Figure S12</b>   | The effect of addition of complexes <b>1-3</b> on the emission intensity of EB bound to CT-DNA                                | <b>9</b>     |
| 7         | <b>Figure S13</b>   | Positive ESI-MS spectra of complex <b>2</b> and <b>3</b> in 30%DMF at neutral pH                                              | <b>10</b>    |
| 8         | <b>Figure S14</b>   | Negative ESI-MS of complex <b>2</b> and <b>3</b>                                                                              | <b>11</b>    |
| 9         | <b>Figure S15</b>   | Control experiment for the transesterification of HPNP in the absence and presence of Zn(OAc) <sub>2</sub> ·2H <sub>2</sub> O | <b>12</b>    |
| 10        | <b>Figure S16</b>   | Dependence of rate of hydrolysis on substrate concentration for complex <b>3</b>                                              | <b>12</b>    |
| 11        | <b>Figure S17</b>   | <sup>31</sup> P NMR of HPNP on addition of 0.1 mM solution of complex <b>3</b>                                                | <b>13</b>    |
| 12        | <b>Figure S18</b>   | ESI-MS spectrum of <b>2</b> and HPNP                                                                                          | <b>13</b>    |
| 13        | <b>Table S1(a)</b>  | Selected bond lengths and angles for <b>1</b>                                                                                 | <b>14</b>    |
| 14        | <b>Table S1(b)</b>  | Hydrogen bonding parameters of <b>1</b>                                                                                       | <b>14</b>    |
| 15        | <b>Table S2</b>     | Selected bond lengths and angles for <b>2</b>                                                                                 | <b>14-15</b> |
| 16        | <b>Table S3(a)</b>  | Selected bond lengths and angles for <b>3</b>                                                                                 | <b>15</b>    |
| 17        | <b>Table S3(b)</b>  | Hydrogen bonding parameters of <b>3</b>                                                                                       | <b>15</b>    |
| 18        | <b>Table S4</b>     | Comparative activities from reported complexes                                                                                | <b>16</b>    |

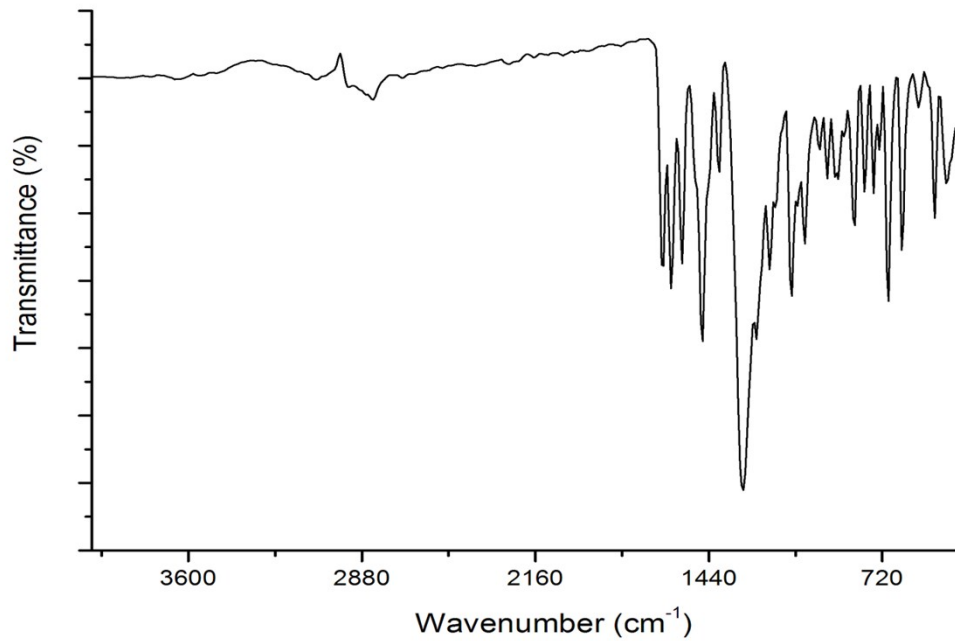

**Figure S1.** I.R. spectrum of complex 1

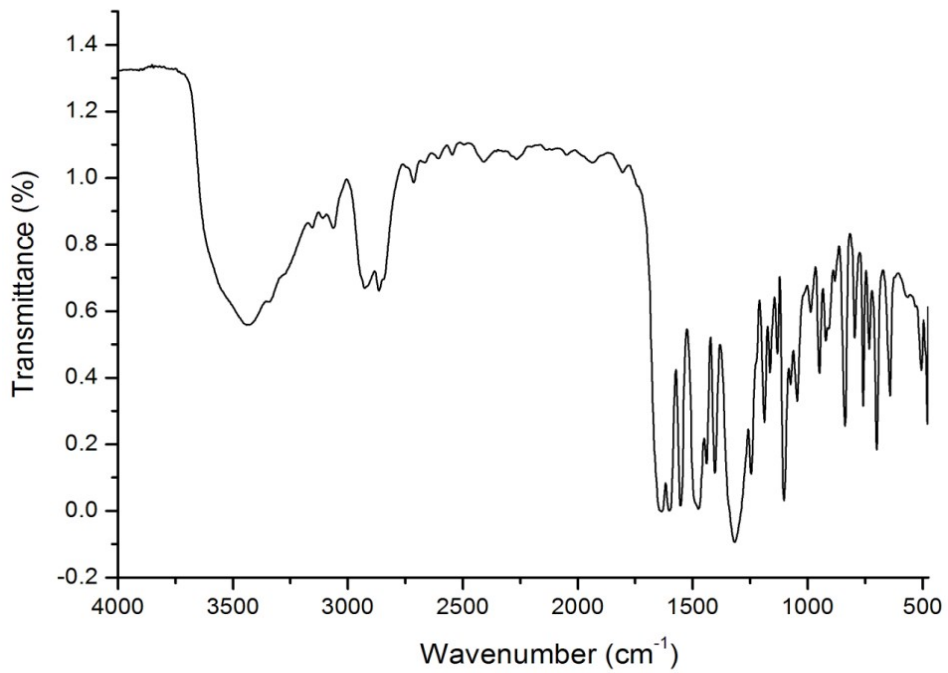

**Figure S2.** I.R. spectrum of complex 2

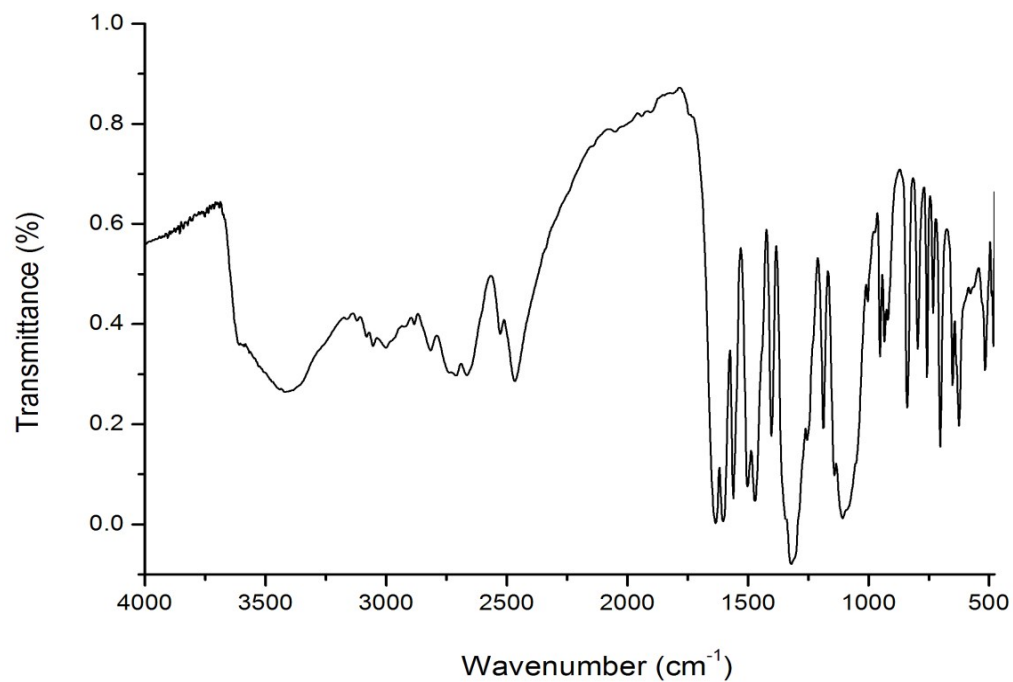

**Figure S3.** I.R. spectrum of complex **3**

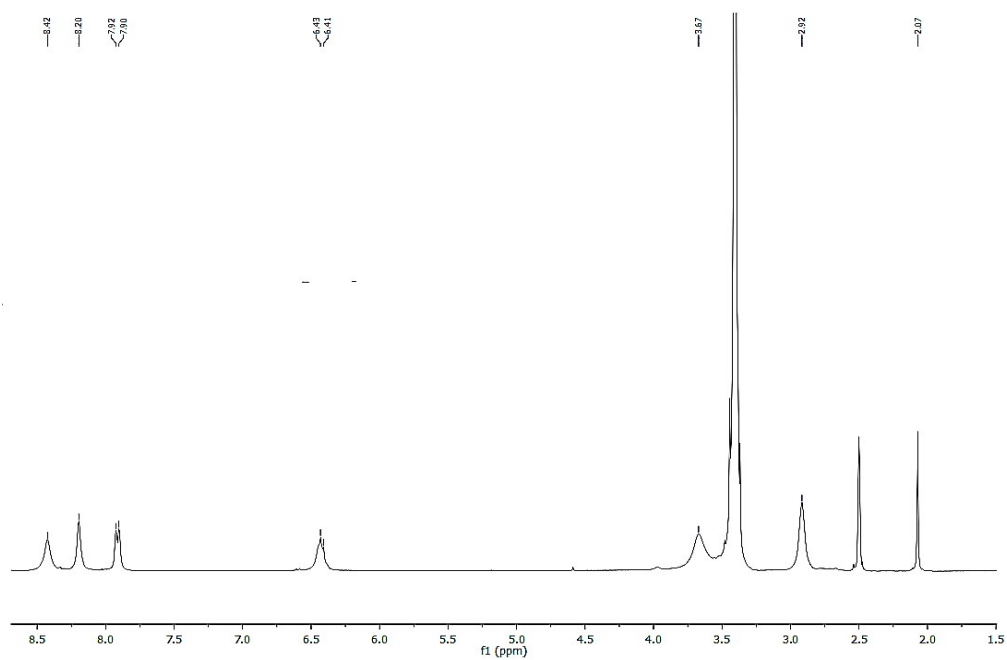

**Figure S4.** <sup>1</sup>H NMR spectrum of compound **1**

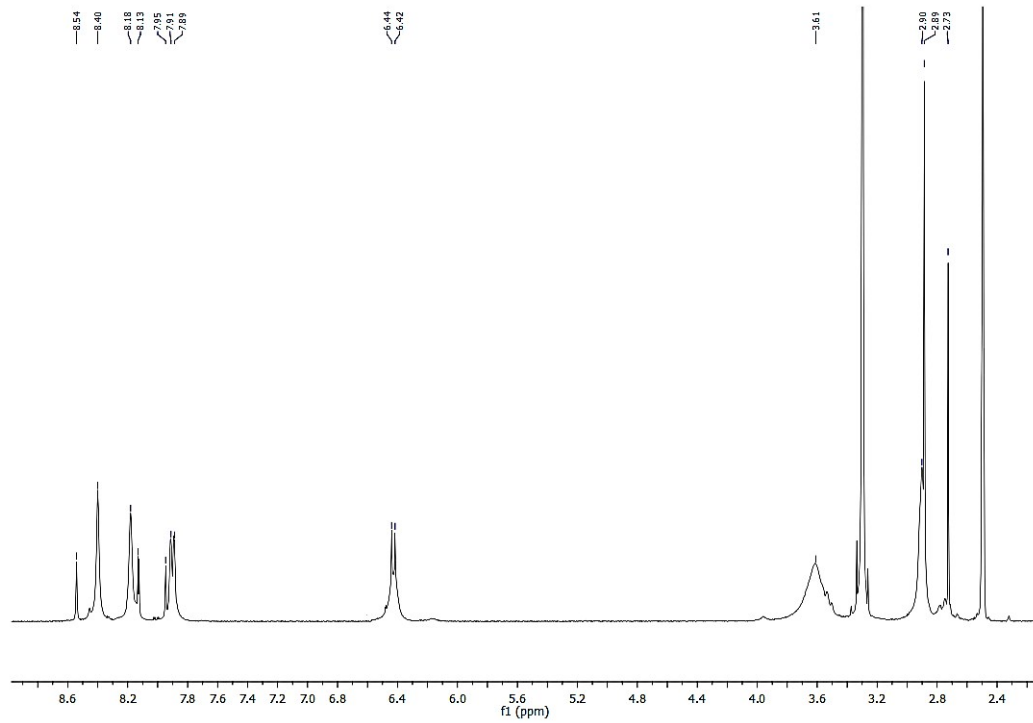

**Figure S5.** <sup>1</sup>H NMR spectrum of compound 2

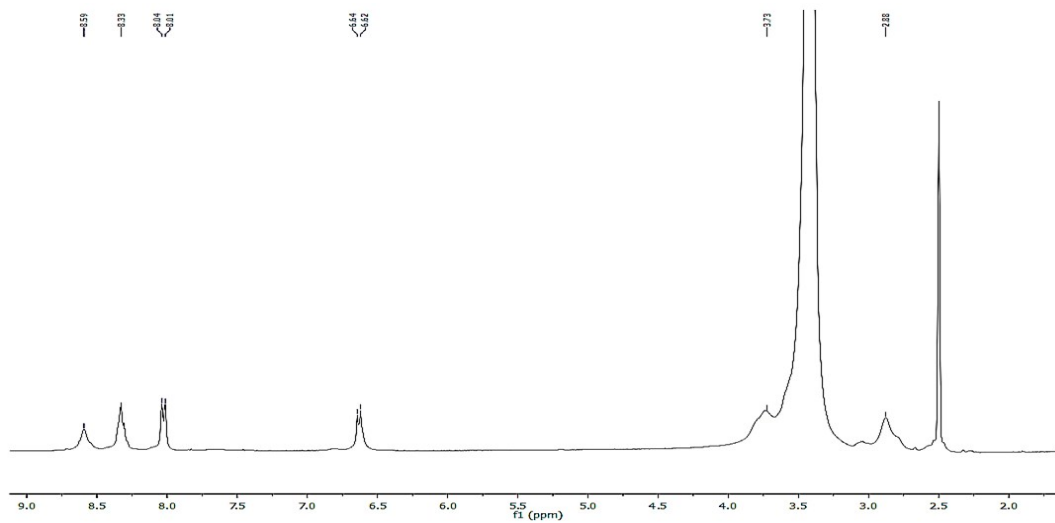

**Figure S6.** <sup>1</sup>H NMR spectrum of compound 3

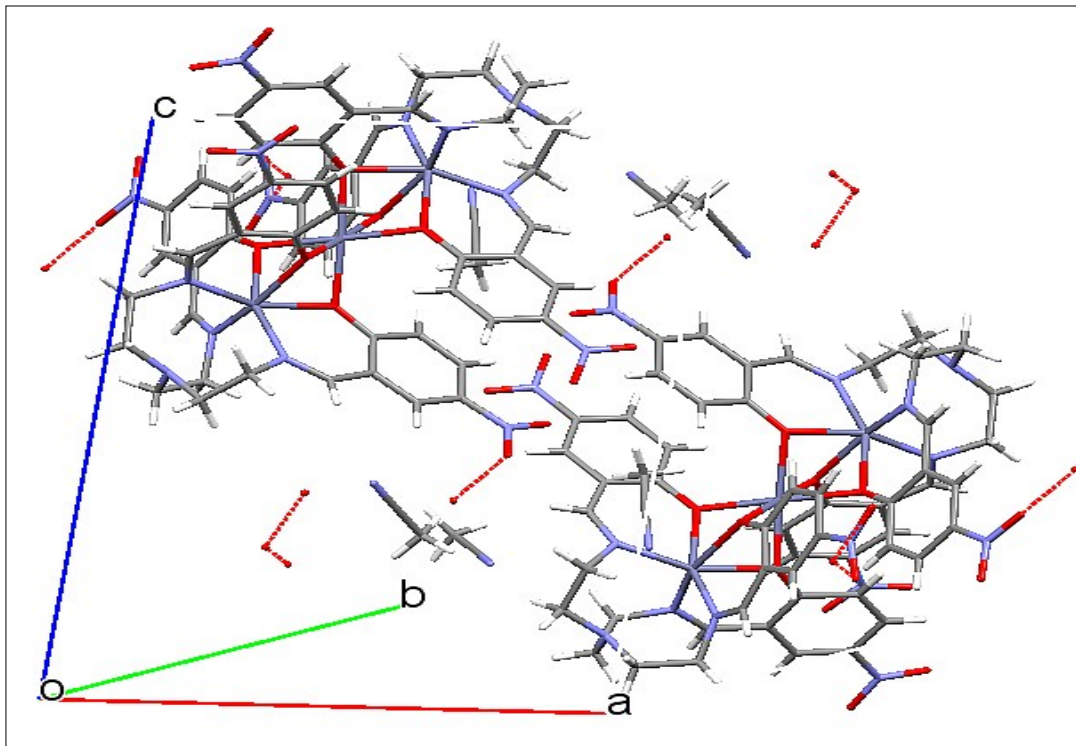

**Figure S7.**Packing diagram of compound 1

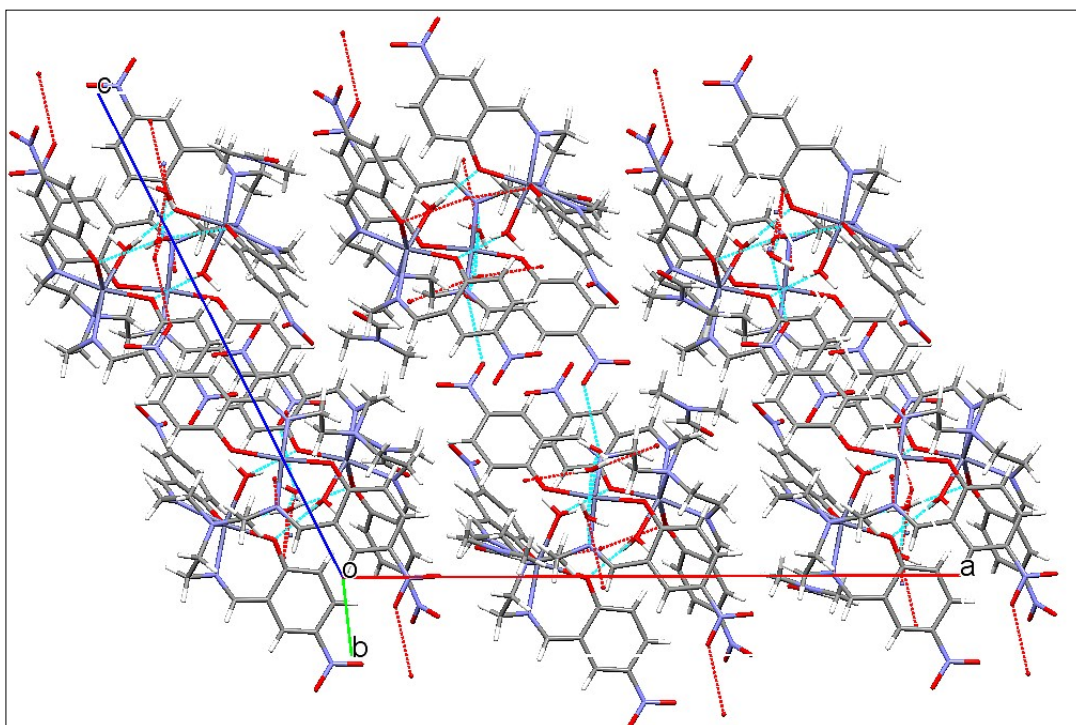

**Figure S8.**Packing diagram of compound 2

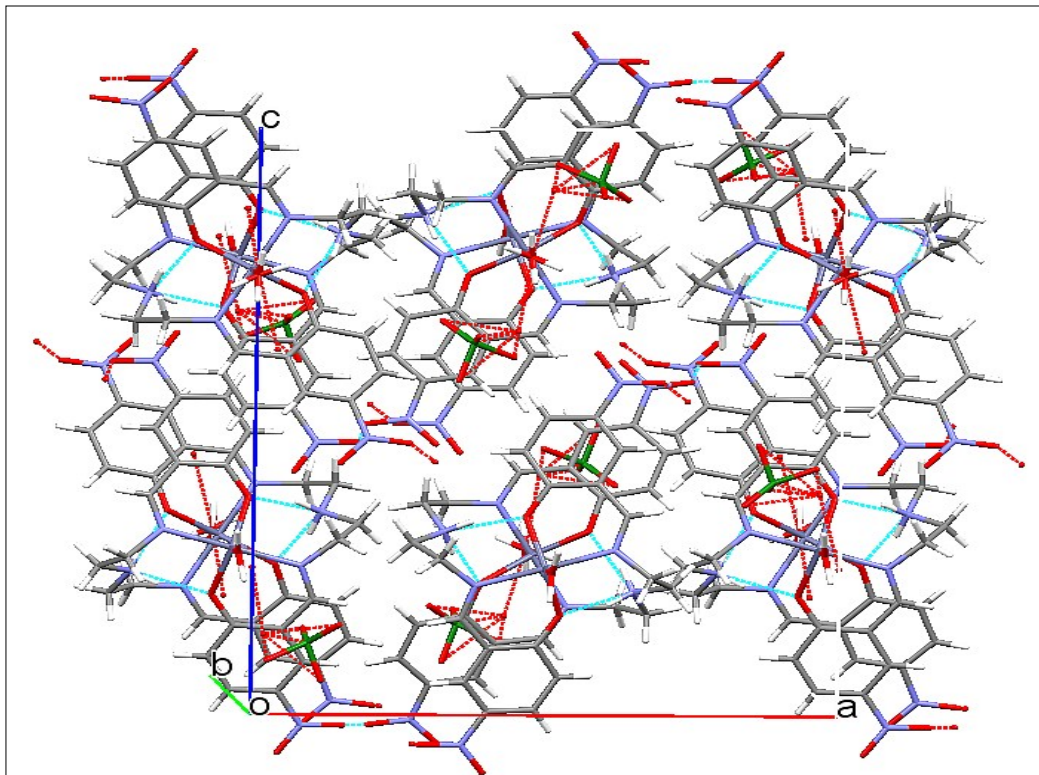

**Figure S9.** Packing diagram of compound 3

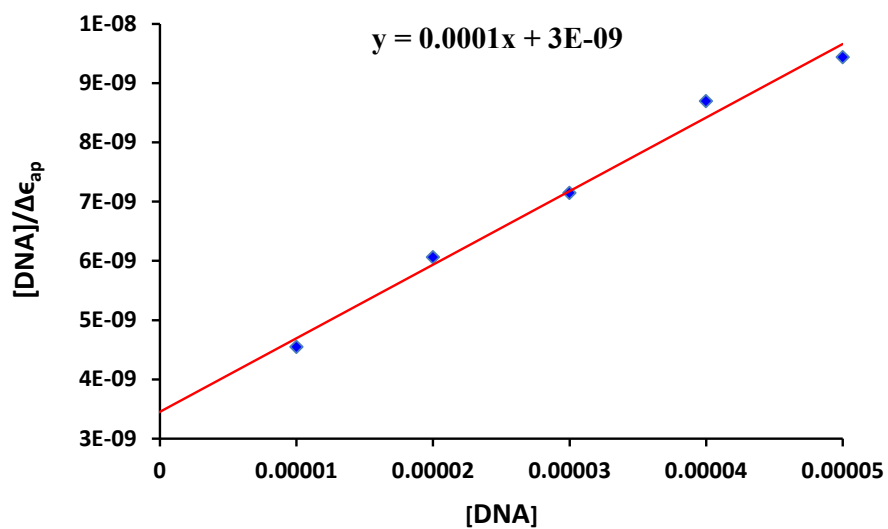

**FigureS10(a).** Plot of [DNA]/Δε versus [DNA] obtained by the absorption titration of CT-DNA with 1.

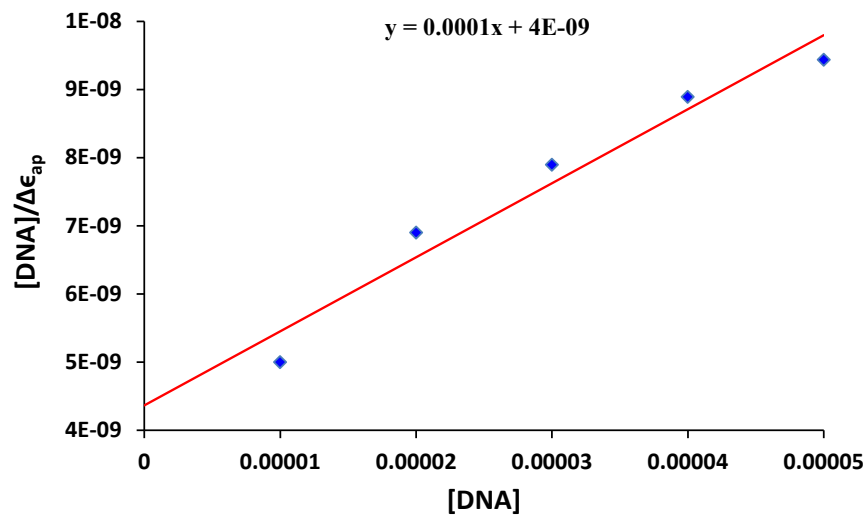

**FigureS10(b).** Plot of  $[DNA]/\Delta\epsilon$  versus  $[DNA]$  obtained by the absorption titration of CT-DNA with **2**.

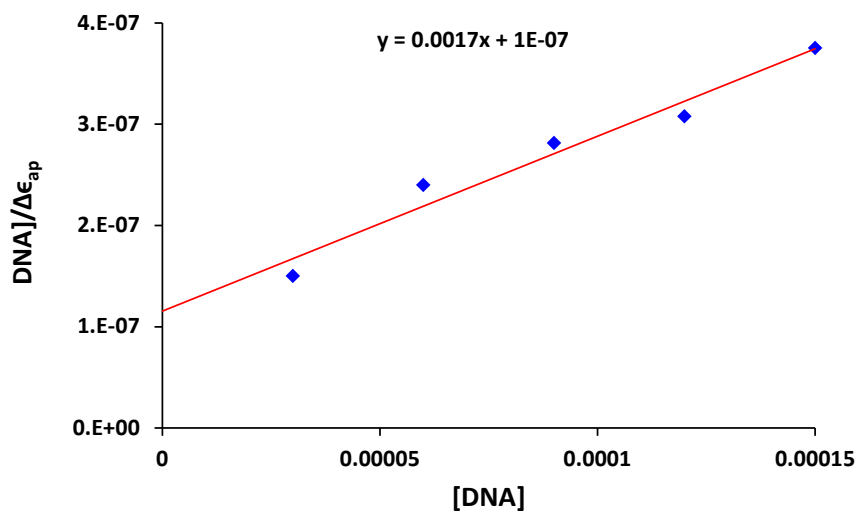

**FigureS10(c).** Plot of  $[DNA]/\Delta\epsilon$  versus  $[DNA]$  obtained by the absorption titration of CT-DNA with **3**.



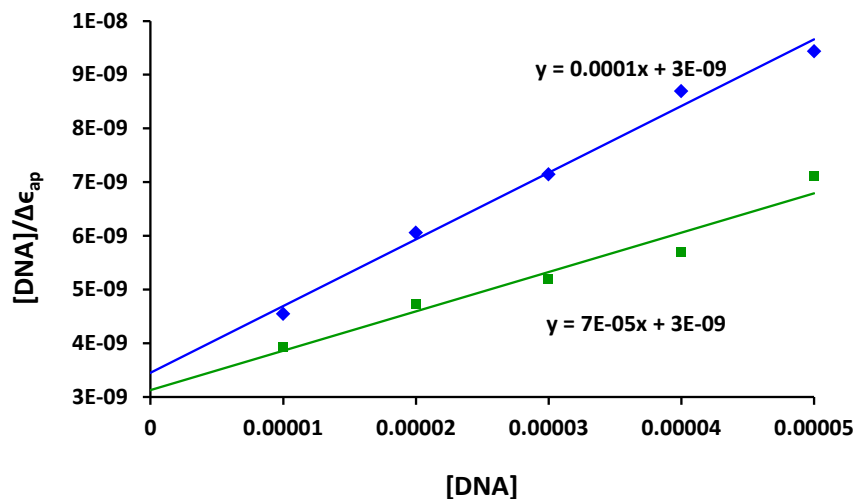

**Figure S11.** Plot of  $[DNA]/\Delta\epsilon$  versus  $[DNA]$  obtained by the absorption titration of CT-DNA with **2** in the absence (Blue) and presence (Green) of 100 mM NaCl solution in 20 mM phosphate buffer at 7.5 pH.

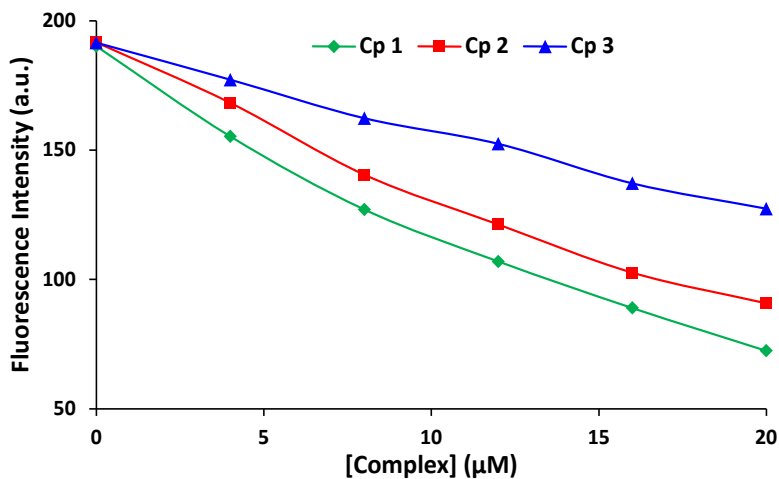

**Figure S12.** The effect of addition of complexes **1-3** (0-20 μM) on the emission intensity of EB (1.25 μM) bound to CT-DNA (25 μM) at 604 nm ( $\lambda_{ex} = 525$  nm), in 50 mM Tris-HCl/NaCl buffered 10% DMF solution (7.5 pH) at room temperature.

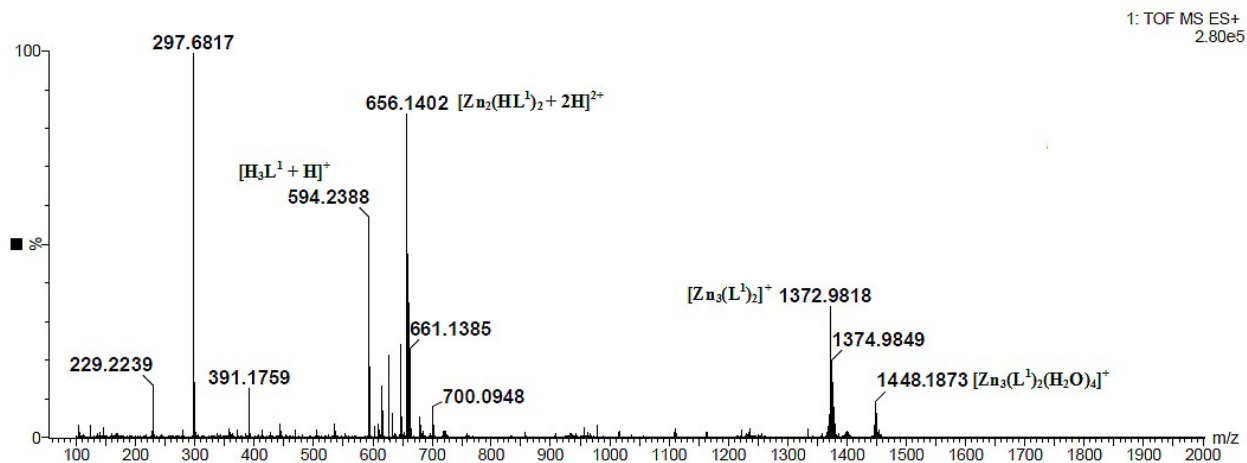

**Figure S13(a).** ESI-MS spectra of complex **2** in DMF-H<sub>2</sub>O (30%, v/v).

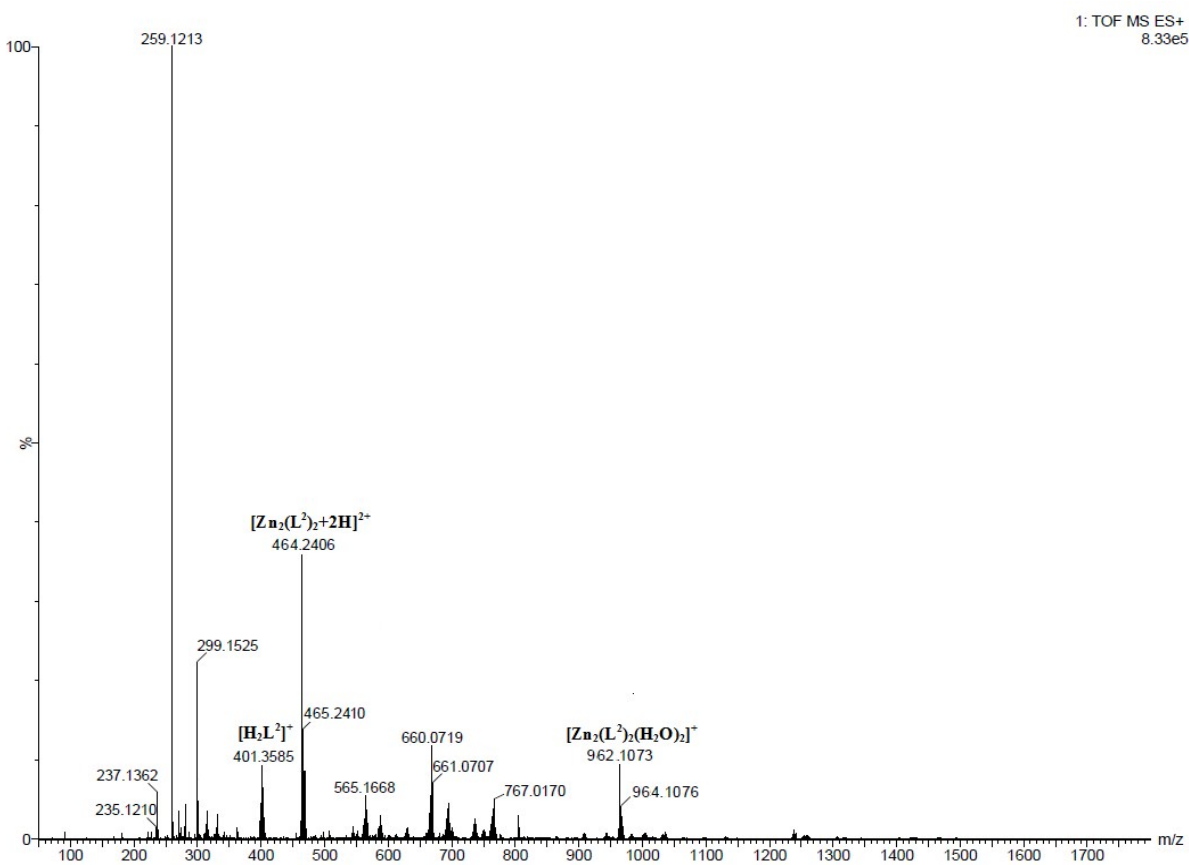

**Figure S13(b).** ESI-MS spectra of complex **3** in DMF-H<sub>2</sub>O (30%, v/v).

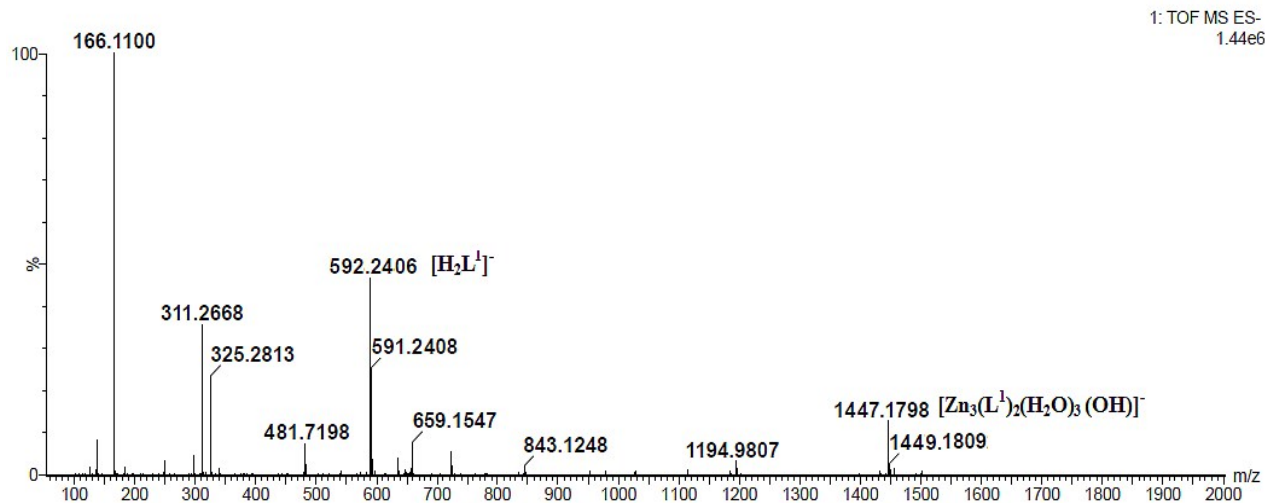

**Figure S14(a).** Negative ESI-MS mode of complex **2** in DMF-H<sub>2</sub>O (30%, v/v) buffered solution at pH 8.5.

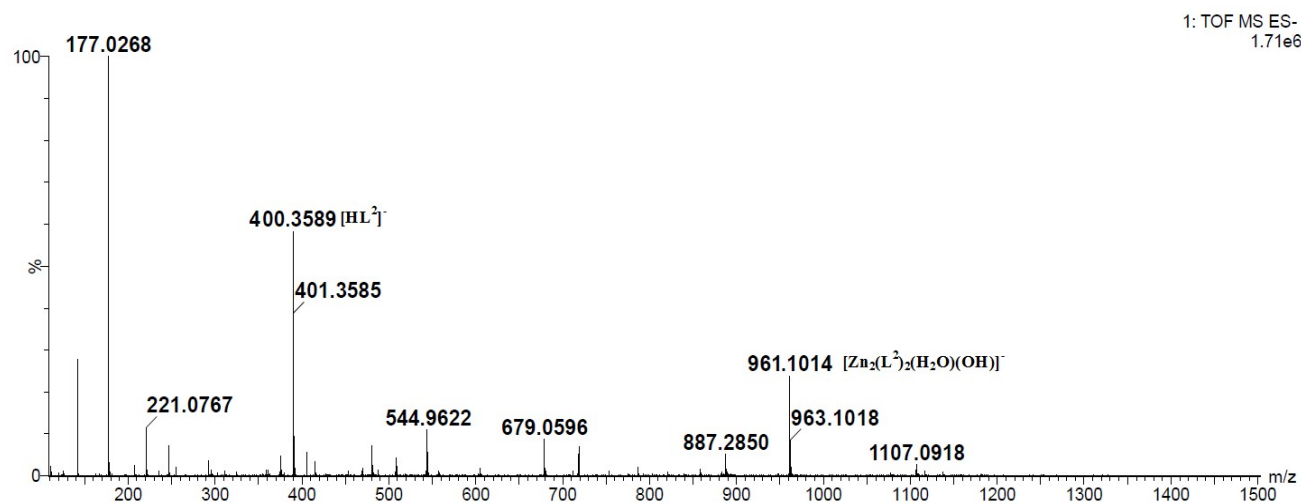

**Figure S14(b).** Negative ESI-MS mode of complex **3** in DMF-H<sub>2</sub>O (30%, v/v) buffered solution at pH 9.0.

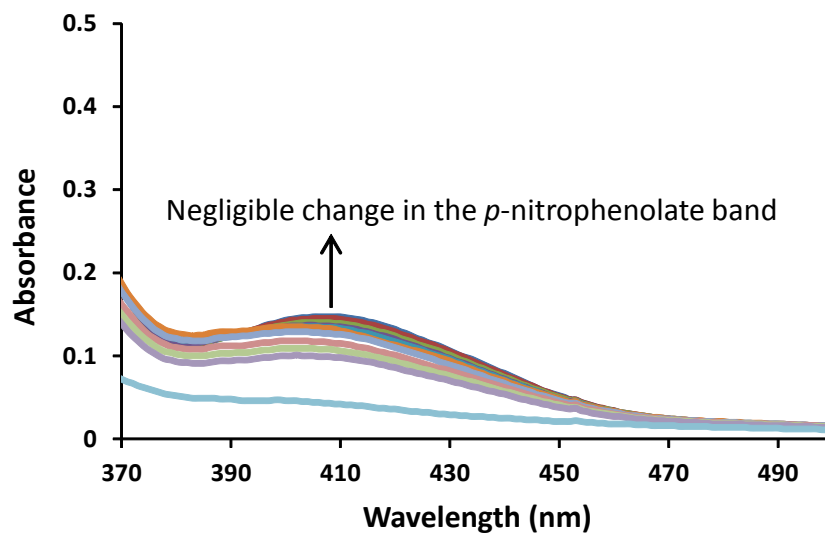

**Figure S15.** Control experiment for the transesterification of HPNP (0.5 mM) in the absence and presence of  $\text{Zn}(\text{OAc})_2 \cdot 2\text{H}_2\text{O}$  (50  $\mu\text{M}$ ) (substrate: metal salt = 10:1) in 30% DMF recorded at an interval of 5 minutes at 30°C.

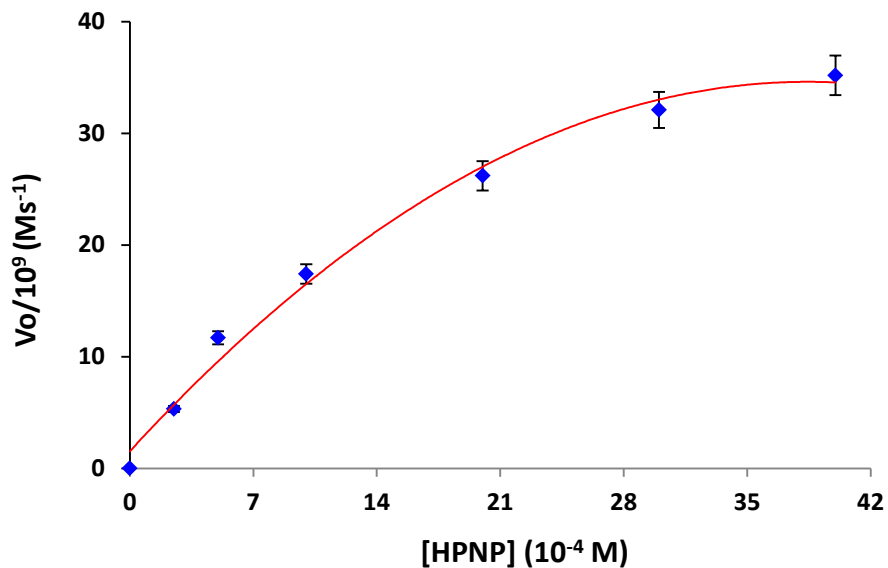

**Figure S16.** Dependence of rate of reaction on substrate concentration (0-4mM) for complex **3** (50  $\mu\text{M}$ ) at 25°C in 30% DMF (pH 8.5).

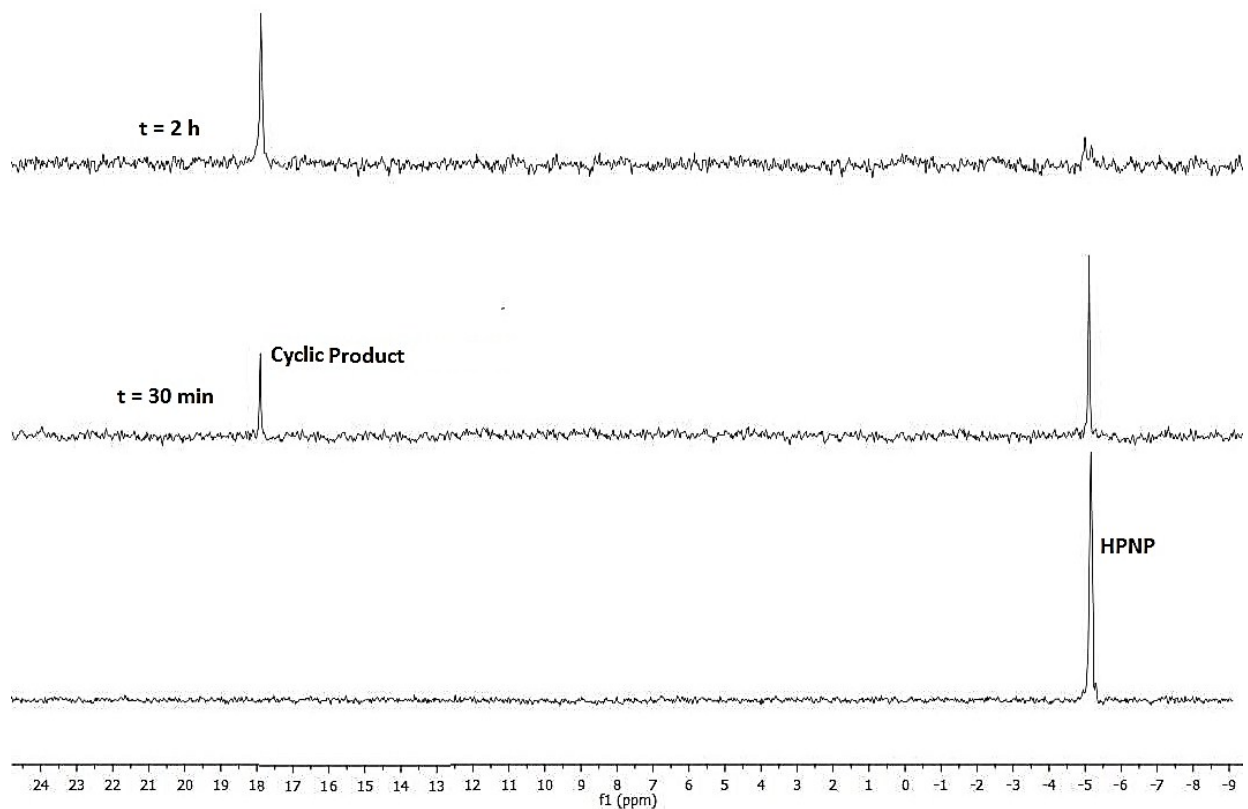

**Figure S17.**  $^{31}\text{P}$  NMR of HPNP on addition of 0.1 mM solution of complex **2** in  $\text{DMSO-}d_6$  (pH 8.5 in the presence of 0.1 M CHES buffer).

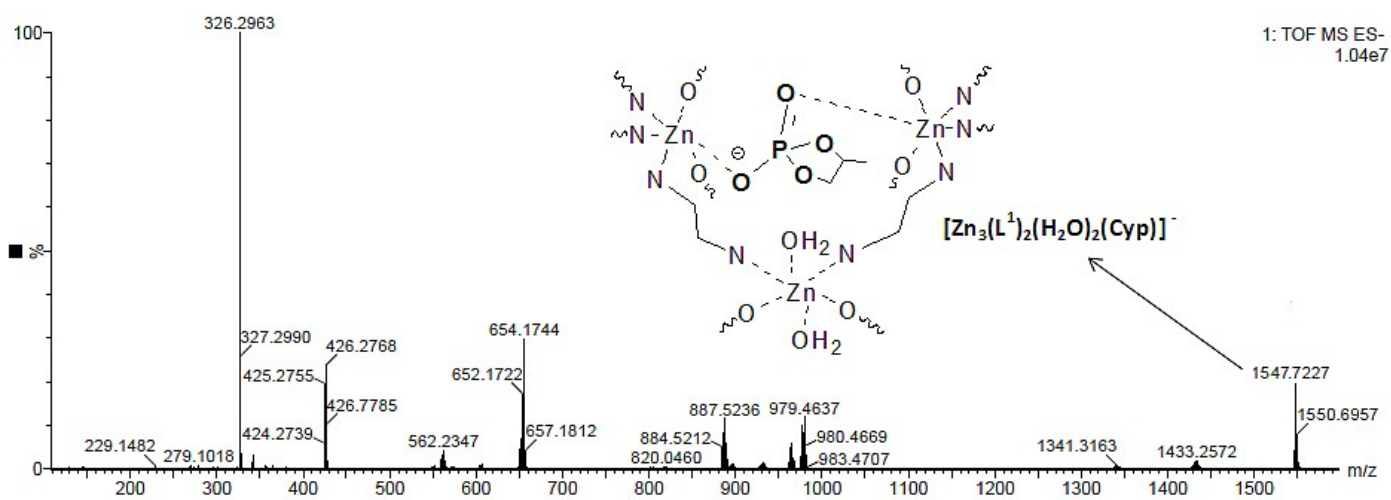

**Fig. S18.** Negative mode ESI-MS spectrum of **2** and HPNP (1:10) at pH 8.50 in 30 % DMF solution

**Table S1(a).** Selected bond lengths and angles (Å, °) for [Zn<sub>3</sub>(L<sup>1</sup>)<sub>2</sub>].H<sub>2</sub>O.4CH<sub>3</sub>CN (**1**)

| Bond length(A <sup>0</sup> ) |            |             |            |            |            |
|------------------------------|------------|-------------|------------|------------|------------|
| Zn(1)-O(1)                   | 2.1558(14) | Zn(1)-N(2)  | 2.0937(17) | Zn(2)-O(1) | 2.0922(12) |
| Zn(1)-O(2)                   | 2.1899(13) | Zn(1)-N(4)  | 2.1088(17) | Zn(2)-O(2) | 2.0964(14) |
| Zn(1)-O(3)                   | 2.1863(14) | Zn(1)-N(6)  | 2.0890(16) | Zn(2)-O(3) | 2.0994(13) |
| Zn(3)-O(4)                   | 2.2039(14) | Zn(3)-N(9)  | 2.1197(15) | Zn(2)-O(4) | 2.1100(11) |
| Zn(3)-O(5)                   | 2.1613(13) | Zn(3)-N(11) | 2.0961(17) | Zn(2)-O(5) | 2.0670(14) |
| Zn(3)-O(6)                   | 2.1921(13) | Zn(3)-N(13) | 2.1128(16) | Zn(2)-O(6) | 2.1210(12) |

  

| Bond angle (°)  |           |                 |           |                   |           |
|-----------------|-----------|-----------------|-----------|-------------------|-----------|
| O(1)-Zn(1)-O(2) | 74.66(5)  | O(4)-Zn(2)-O(6) | 76.94(5)  | O(4)-Zn(3)-O(5)   | 74.95(5)  |
| O(1)-Zn(1)-O(3) | 75.77(5)  | O(5)-Zn(2)-O(6) | 77.83(5)  | O(4)-Zn(3)-O(6)   | 73.56(5)  |
| O(1)-Zn(1)-N(2) | 86.16(6)  | O(1)-Zn(2)-O(2) | 77.98(5)  | O(4)-Zn(3)-N(9)   | 83.35(5)  |
| O(1)-Zn(1)-N(4) | 157.46(5) | O(1)-Zn(2)-O(3) | 79.01(5)  | O(4)-Zn(3)-N(11)  | 158.63(5) |
| O(1)-Zn(1)-N(6) | 92.47(6)  | O(1)-Zn(2)-O(4) | 101.23(5) | O(4)-Zn(3)-N(13)  | 90.67(6)  |
| O(2)-Zn(1)-O(3) | 73.53(5)  | O(1)-Zn(2)-O(5) | 101.10(5) | O(5)-Zn(3)-O(6)   | 74.36(5)  |
| O(2)-Zn(1)-N(2) | 92.53(6)  | O(1)-Zn(2)-O(6) | 178.00(5) | O(5)-Zn(3)-N(9)   | 93.33(5)  |
| O(2)-Zn(1)-N(4) | 83.75(5)  | O(2)-Zn(2)-O(3) | 77.25(5)  | O(5)-Zn(3)-N(11)  | 85.48(5)  |
| O(2)-Zn(1)-N(6) | 157.68(6) | O(2)-Zn(2)-O(4) | 99.34(5)  | O(5)-Zn(3)-N(13)  | 157.63(6) |
| O(3)-Zn(1)-N(2) | 159.46(6) | O(2)-Zn(2)-O(5) | 177.91(5) | O(6)-Zn(3)-N(9)   | 155.91(5) |
| O(3)-Zn(1)-N(4) | 92.14(6)  | O(2)-Zn(2)-O(6) | 103.04(5) | O(6)-Zn(3)-N(11)  | 93.17(6)  |
| O(3)-Zn(1)-N(6) | 85.79(6)  | O(3)-Zn(2)-O(4) | 176.48(6) | O(6)-Zn(3)-N(13)  | 85.27(5)  |
| N(2)-Zn(1)-N(4) | 101.42(7) | O(3)-Zn(2)-O(5) | 104.46(5) | N(9)-Zn(3)-N(11)  | 106.66(6) |
| N(2)-Zn(1)-N(6) | 104.94(6) | O(3)-Zn(2)-O(6) | 102.86(5) | N(9)-Zn(3)-N(13)  | 102.07(6) |
| N(4)-Zn(1)-N(6) | 105.75(6) | O(4)-Zn(2)-O(5) | 78.97(5)  | N(11)-Zn(3)-N(13) | 105.14(6) |

**Table S1(b).** Hydrogen bonding parameters (Å, °) of (**1**)

| D--H...A                         | H...A  | D...A    | D--H...A |
|----------------------------------|--------|----------|----------|
| C19--H19B...O13 <sup>(i)</sup>   | 2.4700 | 3.250(3) | 138.00   |
| C25--H25...O12 <sup>(ii)</sup>   | 2.5400 | 3.342(3) | 144.00   |
| C29--H29A...N15 <sup>(iii)</sup> | 2.6000 | 3.412(4) | 141.00   |
| C39--H39...O7 <sup>(iv)</sup>    | 2.5100 | 3.431(3) | 170.00   |
| C46--H46A...O9 <sup>(v)</sup>    | 2.5500 | 3.322(3) | 136.00   |
| C57--H57A...O11 <sup>(vii)</sup> | 2.5700 | 3.333(4) | 137.00   |

Symmetry codes: (i) 1-x,-y,1-z; (ii) 1-x,1-y,1-z;(iii) 1-x,1-y,1-z;(iv) 1+x,y,z;(v) x,1+y,z;(vi)1-x,1-y,1-z.

**Table S2(a).** Selected bond lengths and angles (Å, °) for [Zn<sub>3</sub>(L<sup>1</sup>)<sub>2</sub>(H<sub>2</sub>O)<sub>4</sub>]. H<sub>2</sub>O. 2DMF (**2**).

| Bond Length(A <sup>0</sup> ) |            |            |            |            |            |
|------------------------------|------------|------------|------------|------------|------------|
| Zn(1)-O(4)                   | 2.231(4)   | Zn(1)-O(1) | 2.0264(17) | Zn(1)-N(2) | 2.136(3)   |
| Zn(2)-O(5)                   | 2.1362(16) | Zn(2)-O(3) | 2.0796(15) | Zn(2)-O(2) | 2.0435(16) |
| Zn(2)-N(6)                   | 2.0826(18) | Zn(2)-N(1) | 2.3400(19) | Zn(2)-N(4) | 2.1349(18) |

| Bond Angle(°)    |            |                  |           |                  |           |
|------------------|------------|------------------|-----------|------------------|-----------|
| O(4)-Zn(1)-O(4)  | 76.23(16)  | O(1)- Zn(1)-O(4) | 91.28(11) | O(1)-Zn(1)-O(4)  | 92.90(12) |
| O(1)-Zn(1)-O(1)  | 174.7(2)   | O(1)-Zn(1)-N(2)  | 89.51(10) | O(1)-Zn(1)- N(2) | 87.67(9)  |
| N(2)-Zn(1)-O(4)  | 160.11(17) | N(2)-Zn(1)- O(4) | 83.99(8)  | N(2)-Zn(1)- N(2) | 115.8(2)  |
| O(5)-Zn(2)-N(1)  | 86.49(7)   | O(3)-Zn(2)- O(5) | 84.13(6)  | O(3)-Zn(2)- N(6) | 85.02(7)  |
| O(3)-Zn(2)-N(1)  | 86.49(7)   | O(3)-Zn(2)- N(1) | 108.16(7) | O(3)-Zn(2)- N(4) | 170.40(7) |
| O(2)-Zn(2)-O(5)  | 96.88(7)   | O(2)-Zn(2)- O(3) | 88.26(7)  | O(2)-Zn(2)- N(6) | 104.72(7) |
| O(2)-Zn(2)-N(1)  | 163.52(7)  | O(2)-Zn(2)- N(4) | 86.83(7)  | N(6)-Zn(2)- O(5) | 155.46(7) |
| N(6)-Zn(2)-N(1)  | 76.11(7).  | N(6)-Zn(2)- N(4) | 104.21(7) | N(4)-Zn(2)- O(5) | 88.27(7)  |
| N(4)-Zn(2)- N(1) | 77.12(7)   |                  |           |                  |           |

**Table S3(a).** Selected bond lengths and angles (Å, °) for  $[\text{Zn}_2(\text{L}^2)_2 \cdot (\text{H}_2\text{O})_2 \cdot 2\text{H}^+].2\text{ClO}_4^-$  (**3**).

| Bond Length(A°) |          |            |          |            |          |
|-----------------|----------|------------|----------|------------|----------|
| Zn(1)-O(2)      | 1.997(2) | Zn(1)-O(3) | 2.040(4) | Zn(1)-N(1) | 2.110(2) |
| Zn(2)-O(1)      | 1.976(2) | Zn(2)-O(4) | 2.023(5) | Zn(2)-N(3) | 2.116(3) |

| Bond Angle(°)   |            |                 |           |                 |            |
|-----------------|------------|-----------------|-----------|-----------------|------------|
| O(2)-Zn(1)-O(2) | 132.84(13) | O(2)-Zn(1)-O(3) | 113.58(7) | O(2)-Zn(1)-N(1) | 87.49(9)   |
| O(2)-Zn(1)-N(1) | 90.18(9)   | O(3)-Zn(1)-N(1) | 92.91(7)  | N(1)-Zn(1)-N(1) | 174.17(14) |
| O(1)-Zn(2)-O(1) | 134.43(14) | O(1)-Zn(2)-O(4) | 112.79(7) | O(1)-Zn(2)-N(3) | 91.79(9)   |
| O(1)-Zn(2)-N(3) | 87.41(9)   | O(4)-Zn(2)-N(3) | 91.03(7)  | N(3)-Zn(2)-N(3) | 177.94(15) |

**Table S3(b).** Hydrogen bonding parameters (Å, °) of (**3**)

| D-H...A                         | D...A  | H...A    | D-H...A |
|---------------------------------|--------|----------|---------|
| N2 -- H2A .. O2 <sup>i</sup>    | 1.8300 | 2.707(3) | 163.00  |
| N2 -- H2B .. O1 <sup>i</sup>    | 1.8600 | 2.734(3) | 162.00  |
| C2 -- H2 .. O8 <sup>ii</sup>    | 2.4900 | 3.383(4) | 161.00  |
| C10 --H10A ..O8 <sup>iii</sup>  | 2.4700 | 3.293(5) | 142.00  |
| C11 -- H11B .. O7 <sup>iv</sup> | 2.4300 | 3.309(5) | 150.00  |

**Equivalent positions:** (i)1-x,y,1/2-z (ii)1/2-x,1/2-y,1/2+z (iii)1/2+x,1/2-y,-z (iv)1-x,1-y,-z

**Table S4.** Phosphatase like activities from reported complexes

| Complex                                                             | Substrate     | Conditions                                             | $K_{cat}$ ( $s^{-1}$ )                 | Reference           |
|---------------------------------------------------------------------|---------------|--------------------------------------------------------|----------------------------------------|---------------------|
| $[Ni_2L(H_2O)_4]4H_2O \cdot 2ClO_4$                                 | 4-NPP         | acetonitrile–water<br>(2.5% (v/v), 25° C               | $3.5 \times 10^{-4}$                   | S1                  |
| $[Cu^II_2(L^1)(\mu O_2CMe)_2][NO_3]$                                | HPNP          | MeOH–H <sub>2</sub> O (33%, v/v)                       | $14.50 \times 10^{-4}$                 | S2                  |
| $[Zn_2(L_2)-(\mu-O_2CMe)_2(MeCN)_2][PF_6]$                          | HPNP          | MeOH-H <sub>2</sub> O (33%, v/v),<br>30° C             | $3.44 \times 10^{-4}$                  | S3                  |
| $[Cu_3(L\_2pyald)(\mu-OAc)](ClO_4)_2$                               | 2,4-<br>BDNPP | CH <sub>3</sub> CN/H <sub>2</sub> O;<br>(50% v/v)      | $9.76 \times 10^{-4}$                  | S4                  |
| $[Cu_2(H_2pat^1)-(\mu-OH)(H_2O)_2]$                                 | BDNPP         | H <sub>2</sub> O : MeCN : MeOH =<br>50 : 45 : 5, 25 °C | $3.95 \times 10^{-3}$                  | S5                  |
| $Zn_2(bpmp)(\mu-OH)(ClO_4)_2$                                       | HPNP          | DMSO–H <sub>2</sub> O (30%, v/v),<br>25° C             | $6.4 \times 10^{-4}$                   | S6                  |
| $[Ni_2(\mu-LClO)(\mu_2-OAc)_2](PF_6) \cdot 3H_2O$                   | BDNPP         | CH <sub>3</sub> CN                                     | $2.80 \times 10^{-3}$                  | S7                  |
| <b><math>[Zn_3(L^1)_2(H_2O)_4] \cdot H_2O \cdot 2DMF</math> (2)</b> | <b>HPNP</b>   | <b>DMF–H<sub>2</sub>O (30%, v/v)</b>                   | <b><math>9.6 \times 10^{-3}</math></b> | <b>Present work</b> |

## References

- [S1] S. Anbu, M. Kandaswamy and B. Varghese, *Dalton Trans.*, 2010, **39**, 3823–3832
- [S2] S. K. Barman, T. Mondal, D. Koley, F. Lloret and R. Mukherjee, *Dalton Trans.*, 2017, 46, 4038–4054
- [S3] H. Arora, S. K. Barman, F. Lloret and R. Mukherjee, *Inorg. Chem.* 2012, **51**, 5539–5553
- [S4] R. E. H. M. B. Osorio, A. Neves, T. P. Camargo, S. L. Mireski, A. J. Bortoluzzi, E. E. Castellano, W. Haase, Z. Tomkowicz, *Inorg. Chim. Acta* 2015, **435**, 153–158.
- [S5] P. Comba, L. R. Gahan, G. R. Hanson and M. Westphal, *Chem. Commun.* 2012, **48**, 9364–9366
- [S6] K. Selmeczi, C. Michel, A. Milet, I. Gautier-Luneau, C. Philouze, J. –L. Pierre, D. Schnieders, A. Rompel and C. Belle, *Chem. Eur. J.* 2007, **13**, 9093 – 9106.
- [S7] S. S. Massoud, C. C. Ledet, T. Junk, S. Bosch, P. Comba, R. Herchel, J. Hošek, Z. Trávníček, R. C. Fischerd and F. A. Mautner, *Dalton Trans.*, 2016, **45**, 12933–12950.
